## Novel *SOX17* frameshift mutations in endometrial cancer are functionally distinct from recurrent missense mutations

Christopher J. Walker<sup>1</sup>, Matthew J. O'Hern<sup>1</sup>, Vanida A. Serna<sup>2</sup>, Takeshi Kurita<sup>2</sup>, Mario A. Miranda<sup>1</sup>, Caroline E. Sapp<sup>1</sup>, David G. Mutch<sup>3</sup>, David E. Cohn<sup>1</sup> and Paul J. Goodfellow<sup>1</sup>

<sup>1</sup>James Comprehensive Cancer Center and the Department of Obstetrics and Gynecology, The Ohio State University, Columbus, OH 43210, USA

<sup>2</sup>James Comprehensive Cancer Center and the Department of Cancer Biology and Genetics, The Ohio State University, Columbus, OH 43210, USA

<sup>3</sup>Siteman Cancer Center and the Department of Obstetrics and Gynecology, Washington University School of Medicine, St. Louis, MO 63110, USA

**Correspondence to:** Paul J. Goodfellow, **email:** paul.goodfellow@osumc.edu

**Keywords:** transcription factor, endometrial cancer, *SOX* gene, *SRY*-box, *SOX17*

**Received:** December 14, 2016

**Accepted:** May 31, 2017

**Published:** August 12, 2017

**Copyright:** Walker et al. This is an open-access article distributed under the terms of the Creative Commons Attribution License 3.0 (CC BY 3.0), which permits unrestricted use, distribution, and reproduction in any medium, provided the original author and source are credited.

### ABSTRACT

**Extensive genomic profiling for endometrioid endometrial carcinoma (EEC) has pointed to genes and pathways important in uterine development as critical mediators of endometrial tumorigenesis. *SOX17* is a developmental transcription factor necessary for proper endoderm formation that has been implicated as a tumor suppressor and shown to modulate WNT signaling. *SOX17* mutation analysis in 539 primary EECs revealed frequent missense and frameshift mutations with an overall 11.5% mutation rate. More than half the mutations identified were frameshifts (32 of 62), and the hotspot missense changes, p.Ala96Gly and p.Ser403Ile, were seen in 14 tumors. None of the cases with a mutation had a second *SOX17* mutation or evidence of allelic loss. Immunofluorescence microscopy performed on primary samples showed that there were no changes in *SOX17* protein expression associated with mutation. Low/absent *SOX17* staining was significantly associated with advanced stage, high tumor grade and reduced recurrence-free survival. Functional assessment of the two hotspot missense mutations and three representative frameshift mutations showed that *SOX17*-A96G and *SOX17*-S403I have transcriptional activities similar to *SOX17* wild-type (WT), whereas none of the frameshift mutant proteins showed transcriptional activity. Forced expression of *SOX17*-WT, -A96G or -S403I in EC cell lines moderately increased  $\beta$ -catenin mediated transcription, which contrasts with previous data showing *SOX17* is an inhibitor of TCF/ $\beta$ -catenin signaling. The proliferation of EC cell lines was expectedly reduced by transfection with *SOX17*-WT, and further reduced by *SOX17*-A96G and *SOX17*-S403I. These data implicate *SOX17* mutation as a selected event in EEC, with clear differences between the missense and frameshift mutations.**

### INTRODUCTION

Endometrial cancer (EC) is the most common gynecologic malignancy and both the incidence and associated mortality of EC are increasing [1]. ECs are

broadly classified into two groups: about 85% of ECs are endometrioid endometrial carcinomas (EECs) and are called type I, whereas type II ECs are non-endometrioid histology (mainly serous, mixed or clear cell) [2, 3]. The genomic landscape of EEC is well established and

includes mutations in oncogenes and tumor suppressor genes involved in a variety of cancers, as well as genes that play distinct roles in the disease [4-8]. Type I tumors are frequently mutated in *PTEN*, *PIK3CA*, *ZFX3*, *CTCF*, *MAX*, *PIK3R1*, *FBXW7* and *CTNNB1*, have few large somatic copy number alterations (SCNAs) [5], and frequently display microsatellite instability (MSI) [9, 10]. The most frequently mutated genes in type II tumors are *TP53*, *PIK3CA*, *PTEN*, *PIK3R1*, and *PPP2R1A*, and these tumors have many more SCNAs than type I ECs [5]. EC has one of the highest mutation rates among cancers [11], and thus many of the less frequently occurring mutations require biologic characterization to determine their importance in EC. The roles of these genes that are less frequently mutated in EEC, in particular those with known roles in uterine development, warrant further investigation.

*SOX17* is a critical transcription factor that specifies endoderm lineages during development [12, 13]. It is essential for uterine adenogenesis during development and shows high expression in the adult uterus [14, 15]. Ectopic expression of SOX family members, and forced expression of a mutant form of *SOX17* can induce de-differentiation of somatic tissues [16, 17]. Not surprisingly, *SOX* abnormalities have been associated with cancers [18]. *SOX17* transcription is repressed in various solid tumors through epigenetic and other mechanisms, and it has been implicated as a tumor suppressor in EC [19-23]. Sequencing efforts by The Cancer Genome Atlas (TCGA) identified somatic *SOX17* mutations in EECs, including two recurrent hotspot missense changes. Here we report that frameshift and stop mutations in *SOX17* are more common in EECs and functionally different than missense changes.

## RESULTS

### Both frameshift and missense mutations frequently occur in *SOX17* in EEC

*SOX17* was sequenced in 539 EECs with 42 different somatic mutations observed in 62 tumors (overall mutation rate = 11.5%, Supplementary Table 1). No tumor harbored more than one *SOX17* mutation, and there was no evidence for loss of heterozygosity (deletion of the wild-type allele) in the mutated tumors (data not shown). Frequent missense and loss-of-function (LOF) mutations were both observed (Figure 1). Thirty-two tumors harbored frameshifts, 25 tumors had missense mutations, 3 tumors had in-frame indels and 2 tumors had nonsense mutations (Supplementary Table 1). The two hotspot missense mutations previously identified by TCGA for EC [5] were evident: p.Ser403Ile was seen in eight tumors and p.Ala96Gly was seen in six tumors. Of the 12 different missense changes seen, 10 are predicted to have deleterious effects on protein function using Condel prediction software [24] (Supplementary Table 1).

The presence of a *SOX17* mutation was significantly associated with MSI, a hyper-mutated phenotype caused by defects in DNA mismatch repair present in ~30% of EECs (Supplementary Table 2). Most of the frameshift mutations seen were not, however, strand-slippage mutations typically associated with MSI. Only four of the 26 different frameshifts occurred in repetitive DNA sequences (p.E264fs\*101, p.P263fs\*124, p.R273fs\*114, and p.P328fs\*59, all of which involved C repeats). The C repeat mutations were seen in MSI tumors only (Supplementary Table 1). Twenty-eight tumors in our

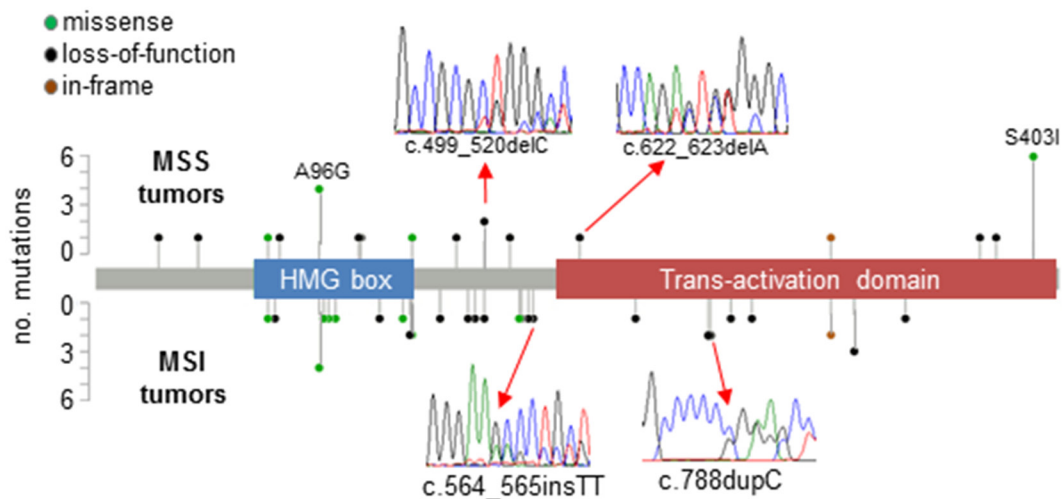

**Figure 1: Pattern of mutations in *SOX17* in EECs.** Lollipop plots show somatic mutations in *SOX17* in 539 EEC samples stratified by DNA mismatch repair status (microsatellite instability positive [MSI] and microsatellite stable [MSS] tumors). Inserts show examples of Sanger sequencing traces from mutant tumors. Forty-two different mutations were observed in 62 tumors, including the hotspot missense changes p.Ala96Gly (observed in MSS and MSI tumors), and p.Ser403Ile (exclusively seen in MSI tumors). A complete description of mutations can be found in Supplementary Table 1.

series have *POLE* proofreading domain mutations that have been associated with an ultra-mutated phenotype (10 *POLE*-mutated tumors are MSI and 18 are MSS) [5, 25, 26]. Only one *POLE*-mutated tumor harbored a *SOX17* mutation and this mutation was likely not mutational noise secondary to the *POLE* defect since it was not a TCT>TAT or TCG>TTG transition [27]. Together these data are consistent with *SOX17* being under cancer specific mutational selection in this tumor type.

*SOX17* mutation status was significantly associated with tumor grade. Fifty percent of *SOX17*-mutant tumors were grade 2, compared to 33% of *SOX17* wild-type (WT) tumors (Supplementary Table 2). Mutation status

was not associated with lymphovascular space invasion or Fédération Internationale de Gynécologie et d'Obstétrique (FIGO) stage, or with patient age, race and body-mass index (Supplementary Table 2). There was no association between *SOX17* mutation status and outcome (data not shown).

### Low *SOX17* expression is associated with poor outcome

To test the hypothesis that *SOX17* mutation is associated with changes in protein expression we used immunofluorescence microscopy to analyze expression in

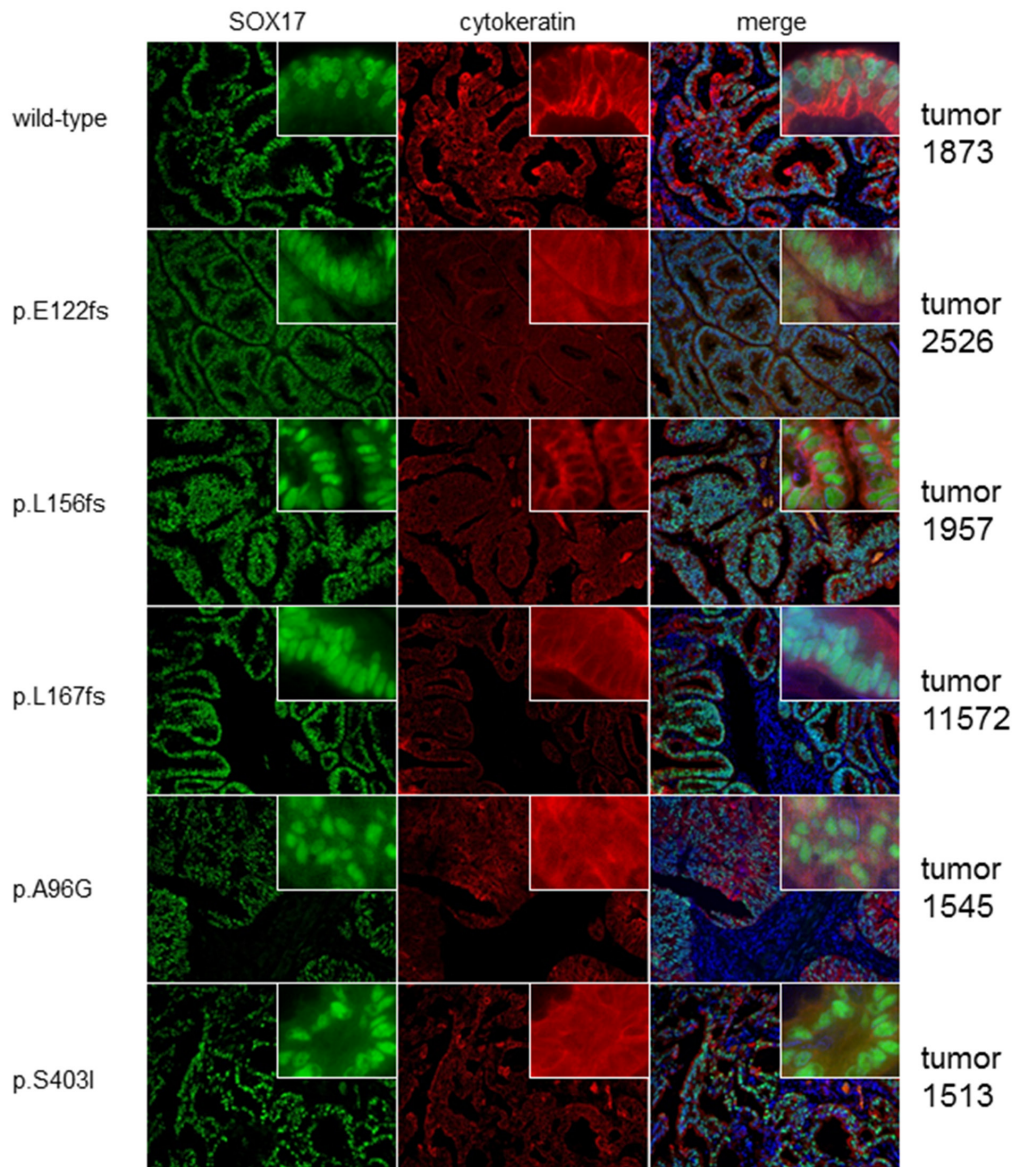

**Figure 2: Mutated and wild-type tumors display similar *SOX17* expression patterns.** Photomicrographs show *SOX17* protein levels in one representative *SOX17* wild-type (WT) tumor and five tumors harboring different *SOX17* mutations. Tumors are counter-stained with cytokeratin to show epithelial tissue. *SOX17* shows strong nuclear staining in the epithelial components of all tumors, regardless of mutation status.

51 primary EECs (37 wild-type and 14 with mutations). The majority (45 of 51) had detectable SOX17 protein. The staining pattern was as expected: SOX17 localized to cell nuclei, was prominent in the glandular epithelial cells and absent in the stromal compartment (Figure 2). Consistent with a previous report [23], advanced stage tumors were more likely to have low/absent SOX17 expression (Supplementary Table 3), and tumors with low/absent SOX17 staining had significantly reduced recurrence-free survival (RFS) (Supplementary Figure 1). There was also a significant association between high grade tumors (grades 2 and 3) with absent/low SOX17 expression (Supplementary Table 3). However, there was no difference in expression levels between the wild-type and mutant cases (Figure 2 and Supplementary Table 3). Because *SOX17* is a two-exon gene, the transcripts from frameshift mutations should escape nonsense-mediated decay, but we were unable to detect putative truncated protein products in most cases because the antibody we used for this staining recognizes an epitope that is C-terminal to most of the frameshift mutations investigated in this experiment (Asp177-Val414). Therefore, the comparable expression levels in tumors with wild-type *SOX17* and those with single N-terminal frameshifts are consistent with allelic compensation.

Because *SOX17* can be epigenetically silenced through promoter methylation we hypothesized that those tumors with absent SOX17 expression might have hypermethylated promoters [28-30]. Combined bisulfite restriction analysis (COBRA) of the 420bp *SOX17* promoter region was performed for five tumors with low/absent SOX17 expression and four with medium/high protein expression. There was very little methylation in this region present in these samples, with only one tumor, 1655T, showing any discernable methylation by COBRA (Supplementary Figure 2A). We confirmed sample 1655T had some methylated CpG sites by directly sequencing TOPO clones from amplified bisulfite converted DNA. We found that 3 of 11 of the PCR clones from tumor 1655T contained at least one intact restriction site, whereas the PCR clones from the COBRA-negative tumor 1484T did not contain any intact sites (Supplementary Figure 2B).

### ***SOX17* frameshift and missense mutants have different transcriptional activities**

To investigate the effects of *SOX17* mutations on protein function, myc-tagged WT-SOX17 and representative SOX17 mutants (A96G, S403I, R115fs, L181fs, and P234fs) were expressed in 293T cells and three different EC cell lines. Western blot of 293T cells transiently transfected with the WT and mutant expression constructs showed expression of all five mutants, with lower mass bands (smaller protein) in the frameshift mutant lanes (Figure 3A). Immunofluorescence microscopy of transfected AN3CA cells proved that all mutant proteins

were localized to the nucleus (Figure 3B), consistent with retention of the predicted nuclear localization sequence in all of the mutants. SOX17 transcriptional activity was assayed using a SOX17-activated luciferase reporter that harbors two compressed SOX-OCT DNA binding sequences (5' CATTGTATGCAAAT 3') [16] (Supplementary Figure 3). Both the SOX17-A96G and SOX17-S403I mutants showed transcriptional activities similar to SOX17-WT in 293T cells and three different EC cell lines (AN3CA, HEC1A and Ishikawa), whereas the frameshift mutations did not show any activity above baseline (Figure 3C). To test if the frameshift mutant proteins were capable of inhibiting transcriptional activity, SOX17-WT was co-transfected with the mutant constructs. SOX17-driven transcription was not reduced by co-expression with the frameshift mutant proteins, indicating that these mutations were not acting as dominant negatives (Supplementary Figure 4).

It has been reported that forced expression of SOX17 reduces proliferation of cancer cell lines [21, 23, 31]. To test if the mutations modulated SOX17's effects on proliferation, SOX17-WT, SOX17-A96G and SOX17-S403I constructs were transfected into four different cell lines and the viability was measured daily (Figure 3D). To determine if the differences in proliferation were due to changes in cell death or growth rate, propidium-iodide cell cycle analysis was performed on AN3CA cells transfected with EV, SOX17-WT, SOX17-A96G and SOX17-S403I. The SOX17-WT and SOX17-mutant expressing cells had increased fractions of cells in the G<sub>0</sub>/G<sub>1</sub> phase, pointing to changes in cell cycle accounting for the differences in proliferation (Figure 3E).

### ***SOX17* missense mutations do not affect $\beta$ -catenin expression or activity**

SOX17 can be induced by  $\beta$ -catenin and can also act as a WNT signaling antagonist in a variety of normal and cancerous tissues [32-34]. To explore the ability of the SOX17 mutants to repress WNT signaling in EC, we used the well-characterized pBAR TCF/ $\beta$ -catenin activated luciferase reporter (also called TOPflash) [35]. Forced expression of SOX17 repressed  $\beta$ -catenin signaling measured by pBAR in SW480 and HCT-116 colorectal cancer (CRC) cell lines, consistent with reported data [22, 34] (Supplementary Figure 5). However, when the same plasmids were transfected into each of three EC cell lines, no repression was seen with any of the SOX17-WT or mutant constructs (Figure 4A). There was also no repression caused by transfection of SOX17-WT or mutant constructs in EC cell lines co-transfected with a mutant form of  $\beta$ -catenin with enhanced stability, indicating that the observed differences between EC and CRC cells were not due to differences in basal levels of  $\beta$ -catenin (Figure 4B).

To further explore the relationship between SOX17 and  $\beta$ -catenin in EEC, primary EECs harboring mutations in *SOX17* or *CTNNB1* (the gene that encodes B-catenin)

were co-stained for both proteins. There was no evidence of enhanced or reduced staining in mutant samples, and we did not see evidence for tissue specific co-expression or exclusivity of SOX17 and  $\beta$ -catenin in any of the specimens examined (Supplementary Figure 6). These data may indicate that the cross-talk between SOX17 and  $\beta$ -catenin evident in developing tissues and other cancer types is not preserved in EC.

## DISCUSSION

The *SOX17* mutation pattern we observed in EECs is consistent with that of a tumor suppressor, in which critical regions are perturbed through single amino acid substitutions, and nonsense and frameshift mutations occur throughout the entire coding sequence. *SOX17* has been implicated as a tumor suppressor gene in various

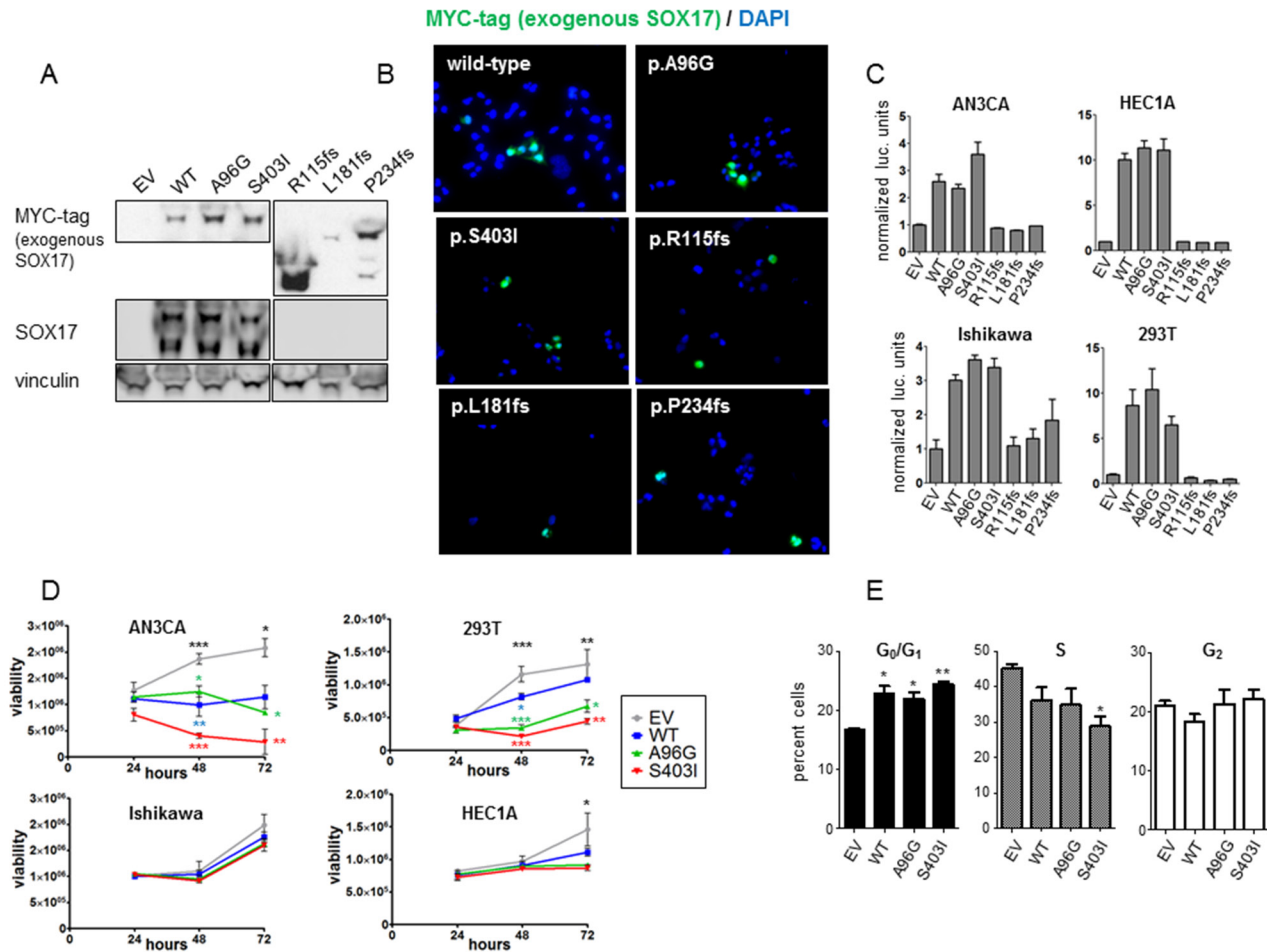

solid tumors [22, 30, 36, 37], and we argue that the mutations we detected occur because of cancer-specific selection rather than mutational noise because of the small size of the gene, the paucity of *SOX17* mutations in *POLE*-mutated tumors and the lack of strand-slippage mutations in MSI tumors. However, the absence of any cases displaying loss of heterozygosity or multiple *SOX17* mutations (i.e. no second hit mutations), and the functional differences between the missense and frameshift mutations indicate that the role of *SOX17* mutations in EEC is unlike classical tumor suppressor genes.

Zhang and colleagues recently used a small number of cases to determine that ECs with reduced SOX17 levels are significantly more often advanced stage and these patients had significantly reduced recurrence-free survival [23]. Our findings support the association between SOX17 expression with advanced EC stage and poor outcome (Supplementary Figure 1 and Supplementary Table 3). We also identified a significant association between *SOX17* mutation status and tumor grade (Supplementary Table 2). This association could in part be explained by the higher rate of *SOX17* mutation in MSI tumors that are known to be more frequently grade 2 tumors [38].

Our functional characterization efforts revealed that the hotspot missense mutations, p.Arg96Gly and p.Ser403Ile, did not affect SOX17-mediated transcriptional activity, but forced expression of SOX17-A96G and SOX17-S403I reduced the viability of transfected EC cell lines even further than transfection with SOX17-WT. This result was unexpected, as we hypothesized that these mutations would negatively affect SOX17 tumor suppressor activity and potentially allow cells to escape the reduced proliferation caused by SOX17. It remains to be seen if these mutations truly inhibit the proliferation of EC in human tumors, or whether this is an artifact of cell line models and *in vitro* culture system.

Interestingly, transfection of the HEC1A and Ishikawa EC cell lines with SOX17-WT did not affect luciferase driven by pBAR (Figure 4). This is in contrast to the SOX17-mediated repression of WNT signaling reported by other groups using the same pBAR reporter plasmid [23, 39, 40]. SOX17 does not directly interact with the reporter, but instead it is an indirect measurement of SOX17's modulation of TCF and  $\beta$ -catenin activity. The effects of SOX17 on pBAR activity has been measured by multiple investigators in multiple cell types and inconsistencies have been described [40]. We speculate that there is a fine balance between SOX17's activation and repression of pBAR that is influenced by multiple factors including: the induction of SOX17 by  $\beta$ -catenin [41], the GSK3 $\beta$ -independent downregulation of  $\beta$ -catenin by SOX17 [34, 42], the direct interaction of SOX17, TCF and  $\beta$ -catenin [33, 34], the similarity between TCF and SOX17 binding motifs [43], the possibility that SOX17-mediated repression of TCF promoter sites involves additional WNT-induced factors other than  $\beta$ -catenin [40],

and the positive feedback loop mediated by TCF-4 sites within the  $\beta$ -catenin promoter [44].

Overall, our identification and characterization of both missense and frameshift mutations in *SOX17* expands upon TCGA's earlier discovery of *SOX17* missense mutations in EC [5]. Our data show that half of *SOX17* mutations are loss-of-function defects, many of which result in loss of transcriptional activity, which further highlights the importance of SOX17 in endometrial tumorigenesis. Gene-by-gene characterization of mutational targets in EC is critical for moving towards a comprehensive understanding of the biology of this tumor type. Our data link *SOX17*, a critical regulator of development that plays a role in proper formation of the uterus with uterine endometrial carcinoma and implicate *SOX17* as another player involved in EC pathobiology.

## MATERIALS AND METHODS

### Patient materials

Tumor samples from patients being treated for uterine cancer were collected by the Division of Gynecologic Oncology, Washington University Medical Center (approved protocols HSC 91-0507 and HSC 93-0828), from 1991-2010. MSI testing was previously performed [45, 46], using the 5 NCI consensus markers (BAT25, BAT26, D2S123, D5S346, and D17S250). *POLE* proofreading domain mutation screening was previously performed [25]. Surgical staging and tumor grade was assigned based on the basis of FIGO 2009 criteria [47, 48].

### Tumor sequencing

Both *SOX17* coding exons were sequenced in 539 EEC samples using a combination of next-generation sequencing (NGS) and Sanger methods. Primers and conditions are supplied in Supplementary Table 4. All variant calls (Sanger and NGS) were sequenced by Sanger methods in paired germline DNA to determine somatic origin. Targeted deep sequencing library preparation was performed using the TruSeq Custom Amplicon Kit v1.5 (Illumina, San Diego, CA), with amplicons targeting both *SOX17* exons and the 3' UTR. Bar-coded and amplified specimens were multiplexed and sequencing was performed on an Illumina MiSeq® using 250 base paired end reads (MiSeq Reagent Kit v2). Variants were identified using Miseq Reporter™ software version 2.5.1 with the GATK variant caller [49, 50].

Sanger sequencing was performed on all tumors for a GC-rich 832bp region of exon 2 that was poorly covered by the target panel (0 reads in most samples), and for all of exon 1 in the 43 tumors that were poorly covered for the exon 1 amplicons (<40X average read depth). Sanger sequencing was performed for an additional 12 tumors to validate the variants detected by targeted deep sequencing.

## Immunofluorescence microscopy

For cell line studies, cells were seeded in 6-well plates on coverslips, then transfected with wild-type (WT) or mutant SOX17 expression constructs using the ProFection® Mammalian Transfection System (Promega, Madison, WI). Forty-eight hours after transfection, cells were fixed using 3.7% formalin, permeabilized with 0.1% triton-100, blocked with 4% normal goat serum, then stained with indicated primary antibody (and subsequent Alexa Fluor-488 secondary antibody) and DAPI. Primary tumor sections (4µm thick) were deparaffinized, then heated in 10mM sodium citrate buffer (pH 6.0) containing 0.05% Tween for 20 minutes in an Electric Pressure

Cooker. Sections were blocked with 2% donkey serum and 1% BSA then incubated with indicated primary antibodies, followed by corresponding secondary antibodies and bisbenzimidazole H 33258 (Hoechst 33258, Sigma-Aldrich, St. Louis, MO). Photomicrographs were captured using a BZ-9000 microscope (Keyence, Osaka, Japan). Microscope settings were not changed between samples and SOX17 intensity was scored by blinded researchers as absent/low, moderate or high (Supplementary Figure 7).

## Viability assay

The indicated cell lines were seeded in opaque 96-well plates, then transfected with WT or mutant SOX17

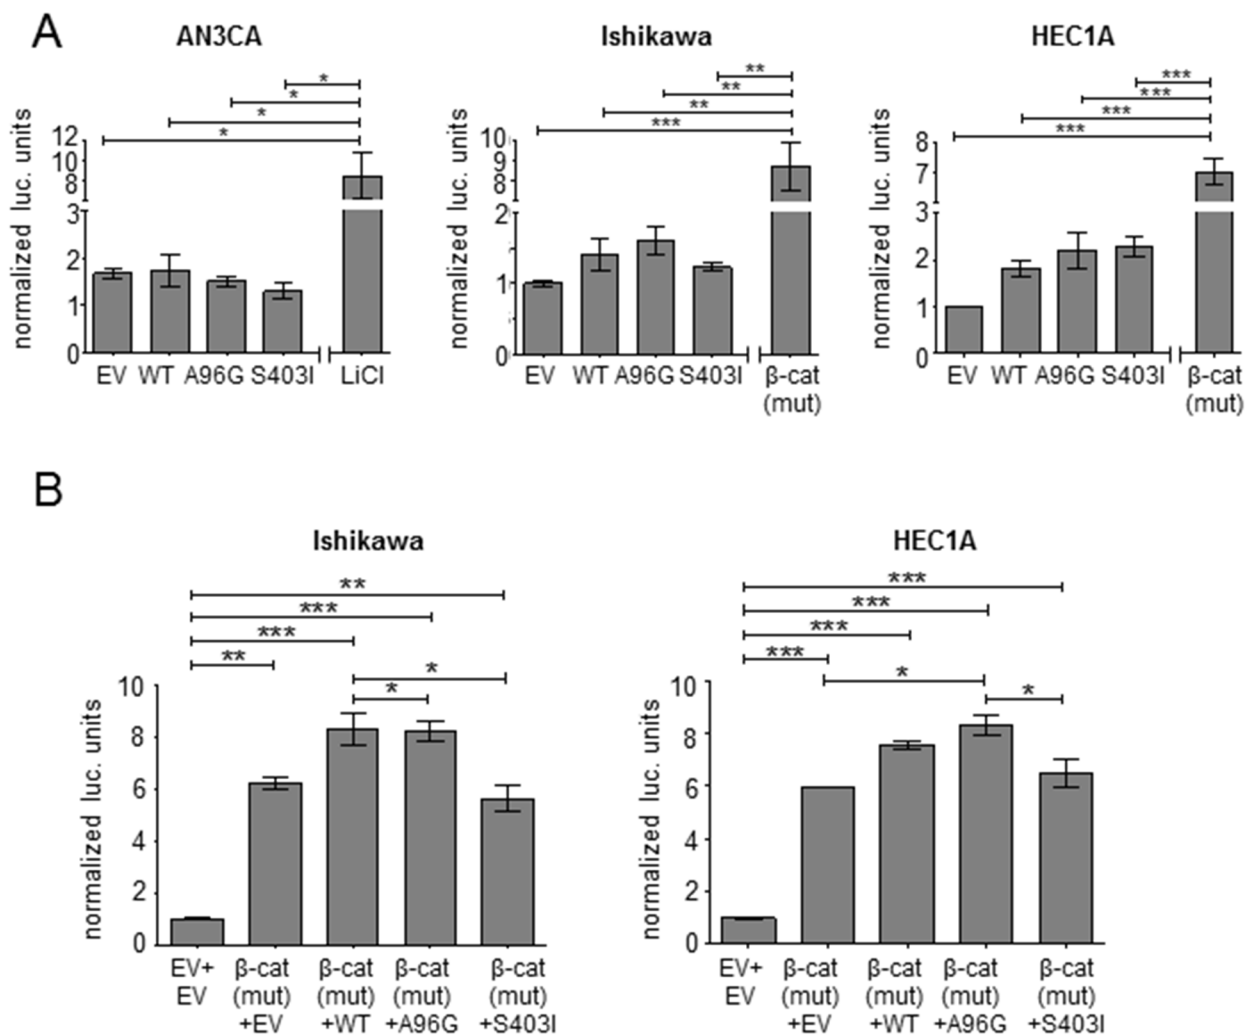

**Figure 4: SOX17 does not repress TCF/β-catenin activity in EC.** (A) SOX17 effects in the context of basal TCF/β-catenin-mediated transcription. Transcriptional activity of the pBAR TCF/β-catenin activity reporter measured in the indicated endometrial cancer cell lines after transfection with empty vector (EV), SOX17-wild-type (WT) or the indicated SOX17 mutants. LiCl treatment or transfection of a quadruple mutant β-catenin (S33A, S37A, T41A, S45A) with enhanced stability were used as controls to activate the reporter. (B) SOX17 effects in the context of elevated TCF/β-catenin-mediated transcription. Co-transfection of the indicated SOX17 construct (or EV) with quadruple mutant β-catenin and the luciferase plasmids was performed in the indicated cell lines. The first lane shows basal reporter activity without mutant β-catenin transfection. Firefly to renilla luciferase ratio is reported (normalized to EV). Significance determined by Tukey's multiple comparison test, \*  $P < 0.5$ ; \*\*  $P < 0.01$ ; \*\*\*  $P < 0.001$ .

expression constructs using Lipofectamine 2000 (Thermo Fisher, Waltham, MA). Viability was assessed every 24 hours using chemiluminescent TiterGlo assays (Promega, Madison, WI) from three biological replicates according to the manufacturer's instructions.

### Cell cycle analysis

AN3CA cells expressing EV, SOX17-WT, SOX17-A96G and SOX17-S403I fixed were in ethanol, treated with RNase A and then suspended in propidium iodide. Fluorescence-activated cell sorting was performed using an LSR II cytometry (Beckman-Coulter, Brea, CA, USA), with 10,000 events recorded per condition. Cell cycle analysis was performed with the FlowJo software v7.6.3 (FlowJo LLC, Ashland, OR, USA) using the Watson model and no constraints.

### COBRA and bisulfite sequencing

Bisulfite conversion of primary tissue DNA was performed using EZ DNA Methylation-Gold Kit reagents (Zymo Research), Irvine, CA. The SOX17 promoter region was amplified as described [30]. Digestion was performed with either HhaI or TaqI, then DNA fragments were resolved on 10% polyacrylamide gels. PCR products were cloned using the PCR-2.1TOPO TA vector (Invitrogen, Carlsbad, CA) and sequenced using the M13 reverse primer.

### Luciferase reporter assay

Cells were seeded in 12-well plates and transfected using Lipofectamine 2000 (Thermo Fisher, Waltham, MA) with the indicated expression plasmids (200ng unless otherwise indicated), renilla luciferase control plasmid (50ng), and a firefly luciferase reporter (200ng unless otherwise indicated). Luciferase was measured via the Dual-Luciferase Reporter System (Promega, Madison, WI).

### Cell culture

293T cells and AN3CA cells were cultured in DMEM (Life Technologies, Carlsbad, CA), Hec-1a cells were cultured in McCoy's 5A media (Life Technologies, Carlsbad, CA), and Ishikawa cells were cultured in 1:1 F12:DMEM (Life Technologies, Carlsbad, CA). All cell lines were cultured with 10% FBS (Life Technologies, Carlsbad, CA). Cell lines used were confirmed to be mycoplasma negative using the MycoAlert Mycoplasma Detection Kit (Lonza, Basel, Switzerland). Cells were obtained from American Type Culture Collection.

### Western blotting

Cells were lysed with RIPA buffer, and lysates were subjected to sodium dodecyl sulfate- polyacrylamide gel electrophoresis followed by nitrocellulose membrane

transfer. Membranes were blocked with non-fat dry milk, and probed with the indicated primary antibody, then HRP-conjugated secondary antibody.

### Antibodies and plasmids

The following antibodies were used: c-Myc (9E10) (sc-40, Santa Cruz Biotechnology, Santa Cruz, CA); SOX17 (AF1974, R&D systems, Minneapolis, MN); pan-cytokeratin (sc-81714, Santa Cruz Biotechnology, Santa Cruz, CA);  $\beta$ -catenin (zymed 13-8400, Thermo Fisher, Waltham, MA) vinculin (v4139, Sigma-Aldrich, St. Louis, MO); HRP-anti-mouse IgG (NA934V, GE Healthcare); Alexa Fluor-488 goat anti-mouse IgG (H+L) (A11029, Invitrogen, Carlsbad, CA), Alexa Fluor-488 donkey anti-goat IgG (H+L) (705-546-147, Jackson ImmunoResearch Laboratories, West Grove, PA); Alexa Fluor-594 donkey anti-mouse IgG (H+L) (715-586-150, Jackson ImmunoResearch Laboratories, West Grove, PA).

The coding sequencing of WT *SOX17* was PCR-amplified from human tumor cDNA synthesized using superscript III reverse transcriptase (Thermo Fisher, Waltham, MA), and cloned into the pCDH-CMV-MCS-EF1-GreenPuro plasmid (SystemsBiosciences Palo Alto, CA). Mutations were introduced using the QuikChange II XL Site-Directed Mutagenesis Kit (Agilent Technologies, Santa Clara, CA). A mutant  $\beta$ -catenin (S33A, S37A, T41A, S45A) expression construct, SOX17 compressed motif reporter [16] and pBAR TCF/ $\beta$ -catenin activated reporter [35] were obtained from addgene.

### Statistical analysis

P-values for survival were calculated by log-rank test. Significance for associations between *SOX17* mutation status and clinicopathologic and demographic variables was calculated by Fisher's exact tests. Testing for associations with SOX17 protein expression was performed by dichotomizing variables as follows: low/absent expression and medium/high expression; *SOX17* mutant and *SOX17* wild-type; grade 1 and grade 2/3; stage I/II and stage III/IV, and using Fisher's exact tests for significance. For viability assays significance was determined for each time point by one-way ANOVA and Tukey's multiple comparison test. For luciferase assays shown in Figure 4, significance was determined by Tukey's multiple comparison test between all groups. For cell cycle analysis significance was determined by Tukey's multiple comparison test. Calculations were performed using Prism 5 (GraphPad Software, La Jolla, CA).

### Abbreviations

CRC, colorectal cancer; EC, endometrial cancer; EECs, endometrioid endometrial carcinomas; FIGO, Fédération Internationale de Gynécologie et d'Obstétrique; LOF, loss-of-function; MSI, microsatellite instability; NGS,



next-generation sequencing; SCNA, somatic copy number alteration; TCGA, The Cancer Genome Atlas; WT, wild-type.

### Author contributions

Study concept originated by CJW and PJG. Experimental design by CJW, TK, DGM, DEC and PJG. Experiments performed by CJW, MJO, VAS and MAM. Manuscript preparation and editing performed by CJW, TK and PJG.

### ACKNOWLEDGMENTS

We would like to thank Alexis Chassen for manuscript editing and data curation. We would like to acknowledge Pearly Yan, David Symer and Sarah Warner with the Ohio State University Genomics Core Facility, and Tea Meulia with the Ohio State University Molecular and Cellular Imagine Center, a CFAES/OARDX core facility, in Wooster, OH. We are very grateful to all of the patients who contributed specimens to this study and all of the attending physicians and staff at the Washington University School of Medicine Division of Gynecologic Oncology, and The Ohio State University College of Medicine Division of Gynecologic Oncology.

### CONFLICTS OF INTEREST

All authors declare no conflicts of interest.

### FUNDING

This study was funded by The National Institutes of Health (R21 CA155674 to P.J.G.), the Pelotonia Fellowship Program (C.J.W.), and the National Cancer Institute (P30 CA016058 supporting the Genomics and Biostatistics shared resources at the Ohio State University Comprehensive Cancer Center).

### REFERENCES

1. Siegel RL, Miller KD, Jemal A. Cancer statistics, 2016. *CA Cancer J Clin.* 2016; 66:7-30.
2. Creasman WT, Odicino F, Maisonneuve P, Quinn MA, Beller U, Benedet JL, Heintz AP, Ngan HY, Pecorelli S. Carcinoma of the corpus uteri. FIGO 26th Annual Report on the Results of Treatment in Gynecological Cancer. *Int J Gynaecol Obstet.* 2006; 95:S105-S143.
3. Bokhman JV. Two pathogenetic types of endometrial carcinoma. *Gynecol Oncol.* 1983; 15:10-17.
4. Kong D, Suzuki A, Zou TT, Sakurada A, Kemp LW, Wakatsuki S, Yokoyama T, Yamakawa H, Furukawa T, Sato M, Ohuchi N, Sato S, Yin J, et al. PTEN1 is frequently mutated in primary endometrial carcinomas. *Nat Genet.* 1997; 17:143-144.
5. The Cancer Genome Atlas Research Network. Integrated genomic characterization of endometrial carcinoma. *Nature.* 2013; 497:67-73.
6. Oda K, Stokoe D, Taketani Y, McCormick F. High frequency of coexistent mutations of PIK3CA and PTEN genes in endometrial carcinoma. *Cancer Res.* 2005; 65:10669-10673.
7. Fukuchi T, Sakamoto M, Tsuda H, Maruyama K, Nozawa S, Hirohashi S. Beta-catenin mutation in carcinoma of the uterine endometrium. *Cancer Res.* 1998; 58:3526-3528.
8. Walker CJ, Miranda MA, O'Hern MJ, McElroy JP, Coombes KR, Bundschuh R, Cohn DE, Mutch DG, Goodfellow PJ. Patterns of CTCF and ZFH3 mutation and associated outcomes in endometrial cancer. *J Natl Cancer Inst.* 2015; 107.
9. Risinger JI, Berchuck A, Kohler MF, Watson P, Lynch HT, Boyd J. Genetic instability of microsatellites in endometrial carcinoma. *Cancer Res.* 1993; 53:5100-5103.
10. Hause RJ, Pritchard CC, Shendure J, Salipante SJ. Classification and characterization of microsatellite instability across 18 cancer types. *Nat Med.* 2016; 22:1342-1350.
11. Alexandrov LB, Nik-Zainal S, Wedge DC, Aparicio SA, Behjati S, Biankin AV, Bignell GR, Bolli N, Borg A, Borresen-Dale AL, Boyault S, Burkhardt B, Butler AP, et al. Signatures of mutational processes in human cancer. *Nature.* 2013; 500:415-421.
12. Kanai-Azuma M, Kanai Y, Gad JM, Tajima Y, Taya C, Kurohmaru M, Sanai Y, Yonekawa H, Yazaki K, Tam PP, Hayashi Y. Depletion of definitive gut endoderm in Sox17-null mutant mice. *Development.* 2002; 129:2367-2379.
13. Viotti M, Nowotschin S, Hadjantonakis AK. SOX17 links gut endoderm morphogenesis and germ layer segregation. *Nat Cell Biol.* 2014; 16:1146-1156.
14. Guimaraes-Young A, Neff T, Dupuy AJ, Goodheart MJ. Conditional deletion of Sox17 reveals complex effects on uterine adenogenesis and function. *Dev Biol.* 2016; 414:219-227.
15. Hirate Y, Suzuki H, Kawasumi M, Takase HM, Igarashi H, Naquet P, Kanai Y, Kanai-Azuma M. Mouse Sox17 haploinsufficiency leads to female subfertility due to impaired implantation. *Sci Rep.* 2016; 6:24171.
16. Jauch R, Aksoy I, Hutchins AP, Ng CK, Tian XF, Chen J, Palasingam P, Robson P, Stanton LW, Kolatkar PR. Conversion of Sox17 into a pluripotency reprogramming factor by reengineering its association with Oct4 on DNA. *Stem Cells.* 2011; 29:940-951.
17. Takahashi K, Yamanaka S. Induction of pluripotent stem cells from mouse embryonic and adult fibroblast cultures by defined factors. *Cell.* 2006; 126:663-676.
18. Sarkar A, Hochedlinger K. The sox family of transcription factors: versatile regulators of stem and progenitor cell fate. *Cell Stem Cell.* 2013; 12:15-30.
19. Balgouranidou I, Chimonidou M, Milaki G, Tsaroucha E, Kakolyris S, Georgoulis V, Lianidou E. SOX17 promoter

- methylation in plasma circulating tumor DNA of patients with non-small cell lung cancer. *Clin Chem Lab Med*. 2016; 54:1385-1393.
20. Fu DY, Tan HS, Wei JL, Zhu CR, Jiang JX, Zhu YX, Cai FL, Chong MH, Ren CL. Decreased expression of SOX17 is associated with tumor progression and poor prognosis in breast cancer. *Tumour Biol*. 2015; 36:8025-8034.
  21. Kuo IY, Wu CC, Chang JM, Huang YL, Lin CH, Yan JJ, Sheu BS, Lu PJ, Chang WL, Lai WW, Wang YC. Low SOX17 expression is a prognostic factor and drives transcriptional dysregulation and esophageal cancer progression. *Int J Cancer*. 2014; 135:563-573.
  22. Zhang W, Glockner SC, Guo M, Machida EO, Wang DH, Easwaran H, Van Neste L, Herman JG, Schuebel KE, Watkins DN, Ahuja N, Baylin SB. Epigenetic inactivation of the canonical Wnt antagonist SRY-box containing gene 17 in colorectal cancer. *Cancer Res*. 2008; 68:2764-2772.
  23. Zhang Y, Bao W, Wang K, Lu W, Wang H, Tong H, Wan X. SOX17 is a tumor suppressor in endometrial cancer. *Oncotarget*. 2016; 7:76036-76046. <https://doi.org/10.18632/oncotarget.12582>.
  24. Gonzalez-Perez A, Lopez-Bigas N. Improving the assessment of the outcome of nonsynonymous SNVs with a consensus deleteriousness score, Condel. *Am J Hum Genet*. 2011; 88:440-449.
  25. Billingsley CC, Cohn DE, Mutch DG, Stephens JA, Suarez AA, Goodfellow PJ. Polymerase epsilon (POLE) mutations in endometrial cancer: clinical outcomes and implications for Lynch syndrome testing. *Cancer*. 2015; 121:386-394.
  26. Church DN, Stelloo E, Nout RA, Valtcheva N, Depreeuw J, ter Haar N, Noske A, Amant F, Tomlinson IP, Wild PJ, Lambrechts D, Jurgenliemk-Schulz IM, Jobsen JJ, et al. Prognostic significance of POLE proofreading mutations in endometrial cancer. *J Natl Cancer Inst*. 2015; 107:402.
  27. Alexandrov LB, Nik-Zainal S, Wedge DC, Aparicio SA, Behjati S, Biankin AV, Bignell GR, Bolli N, Borg A, Borresen-Dale AL, Boyault S, Burkhardt B, Butler AP, et al. Signatures of mutational processes in human cancer. *Nature*. 2013; 500:415-421.
  28. Hulbert A, Jusue-Torres I, Stark A, Chen C, Rodgers K, Lee B, Griffin C, Yang A, Huang P, Wrangle J, Belinsky SA, Wang TH, Yang SC, et al. Early detection of lung cancer using DNA promoter hypermethylation in plasma and sputum. *Clin Cancer Res*. 2017; 23:1998-2005.
  29. Voorham QJ, Janssen J, Tijssen M, Snellenberg S, Mongera S, van Grieken NC, Grabsch H, Kliment M, Rembacken BJ, Mulder CJ, van Engeland M, Meijer GA, Steenbergen RD, Carvalho B. Promoter methylation of Wnt-antagonists in polypoid and nonpolypoid colorectal adenomas. *BMC Cancer*. 2013; 13:603.
  30. Fu DY, Wang ZM, Li C, Wang BL, Shen ZZ, Huang W, Shao ZM. Sox17, the canonical Wnt antagonist, is epigenetically inactivated by promoter methylation in human breast cancer. *Breast Cancer Res Treat*. 2010; 119:601-612.
  31. Jia Y, Yang Y, Liu S, Herman JG, Lu F, Guo M. SOX17 antagonizes WNT/beta-catenin signaling pathway in hepatocellular carcinoma. *Epigenetics*. 2010; 5:743-749.
  32. Chen HL, Chew LJ, Packer RJ, Gallo V. Modulation of the Wnt/beta-catenin pathway in human oligodendrogloma cells by Sox17 regulates proliferation and differentiation. *Cancer Lett*. 2013; 335:361-371.
  33. Zorn AM, Barish GD, Williams BO, Lavender P, Klymkowsky MW, Varmus HE. Regulation of Wnt signaling by Sox proteins: XSox17 alpha/beta and XSox3 physically interact with beta-catenin. *Mol Cell*. 1999; 4:487-498.
  34. Sinner D, Kordich JJ, Spence JR, Opoka R, Rankin S, Lin SC, Jonatan D, Zorn AM, Wells JM. Sox17 and Sox4 differentially regulate beta-catenin/T-cell factor activity and proliferation of colon carcinoma cells. *Mol Cell Biol*. 2007; 27:7802-7815.
  35. Korinek V, Barker N, Morin PJ, van Wichen D, de Weger R, Kinzler KW, Vogelstein B, Clevers H. Constitutive transcriptional activation by a beta-catenin-Tcf complex in APC-/- colon carcinoma. *Science*. 1997; 275:1784-1787.
  36. Fan R, Zhao XL, Wang H, He HY, Peng ZP, Yang B, Han T, Wang W, Wang XQ, Lin GW. Abnormal methylation of the sex-determining region Y-box 17 (SOX17) promoter predicts poor prognosis in myelodysplastic syndrome. *Clin Lab*. 2014; 60:1465-1474.
  37. Li JY, Han C, Zheng LL, Guo MZ. Epigenetic regulation of Wnt signaling pathway gene SRY-related HMG-box 17 in papillary thyroid carcinoma. *Chin Med J (Engl)*. 2012; 125:3526-3531.
  38. McMeekin DS, Trichter DL, Cohn DE, Mutch DG, Lankes HA, Geller MA, Powell MA, Backes FJ, Landrum LM, Zaino R, Broaddus RD, Ramirez N, Gao F, et al. Clinicopathologic significance of mismatch repair defects in endometrial cancer: an NRG Oncology/Gynecologic Oncology Group study. *J Clin Oncol*. 2016; 34:3062-3068.
  39. Park KS, Wells JM, Zorn AM, Wert SE, Whitsett JA. Sox17 influences the differentiation of respiratory epithelial cells. *Dev Biol*. 2006; 294:192-202.
  40. Liu X, Luo M, Xie W, Wells JM, Goodheart MJ, Engelhardt JF. Sox17 modulates Wnt3A/beta-catenin-mediated transcriptional activation of the Lef-1 promoter. *Am J Physiol Lung Cell Mol Physiol*. 2010; 299:L694-L710.
  41. Engert S, Burtscher I, Liao WP, Dulev S, Schotta G, Lickert H. Wnt/beta-catenin signalling regulates Sox17 expression and is essential for organizer and endoderm formation in the mouse. *Development*. 2013; 140:3128-3138.
  42. Du YC, Oshima H, Oguma K, Kitamura T, Itadani H, Fujimura T, Piao YS, Yoshimoto T, Minamoto T, Kotani H, Taketo MM, Oshima M. Induction and down-regulation of Sox17 and its possible roles during the course of

- gastrointestinal tumorigenesis. *Gastroenterology*. 2009; 137:1346-1357.
43. Harley VR, Lovell-Badge R, Goodfellow PN. Definition of a consensus DNA binding site for SRY. *Nucleic Acids Res*. 1994; 22:1500-1501.
  44. Bandapalli OR, Dihlmann S, Helwa R, Macher-Goeppinger S, Weitz J, Schirmacher P, Brand K. Transcriptional activation of the beta-catenin gene at the invasion front of colorectal liver metastases. *J Pathol*. 2009; 218:370-379.
  45. Zigelboim I, Goodfellow PJ, Gao F, Gibb RK, Powell MA, Rader JS, Mutch DG. Microsatellite instability and epigenetic inactivation of MLH1 and outcome of patients with endometrial carcinomas of the endometrioid type. *J Clin Oncol*. 2007; 25:2042-2048.
  46. Zigelboim I, Schmidt AP, Gao F, Thaker PH, Powell MA, Rader JS, Gibb RK, Mutch DG, Goodfellow PJ. ATR mutation in endometrioid endometrial cancer is associated with poor clinical outcomes. *J Clin Oncol*. 2009; 27:3091-3096.
  47. Creasman W. Revised FIGO staging for carcinoma of the endometrium. *Int J Gynaecol Obstet*. 2009; 105:109.
  48. Pecorelli S. Revised FIGO staging for carcinoma of the vulva, cervix, and endometrium. *Int J Gynaecol Obstet*. 2009; 105:103-104.
  49. DePristo MA, Banks E, Poplin R, Garimella KV, Maguire JR, Hartl C, Philippakis AA, del Angel G, Rivas MA, Hanna M, McKenna A, Fennell TJ, Kernytzky AM, et al. A framework for variation discovery and genotyping using next-generation DNA sequencing data. *Nat Genet*. 2011; 43:491-498.
  50. McKenna A, Hanna M, Banks E, Sivachenko A, Cibulskis K, Kernytzky A, Garimella K, Altshuler D, Gabriel S, Daly M, DePristo MA. The Genome Analysis Toolkit: a MapReduce framework for analyzing next-generation DNA sequencing data. *Genome Res*. 2010; 20:1297-1303.
  51. Kanai Y, Kanai-Azuma M, Noce T, Saido TC, Shiroishi T, Hayashi Y, Yazaki K. Identification of two Sox17 messenger RNA isoforms, with and without the high mobility group box region, and their differential expression in mouse spermatogenesis. *J Cell Biol*. 1996; 133:667-681.
